# Supplementary material for: Dysregulation of Circular RNAs in Myotonic Dystrophy Type 1
Source: MDPI journal article supplement (doi:10.3390/ijms20081938), 2019-04-19
Supplement: s1 [file s1]

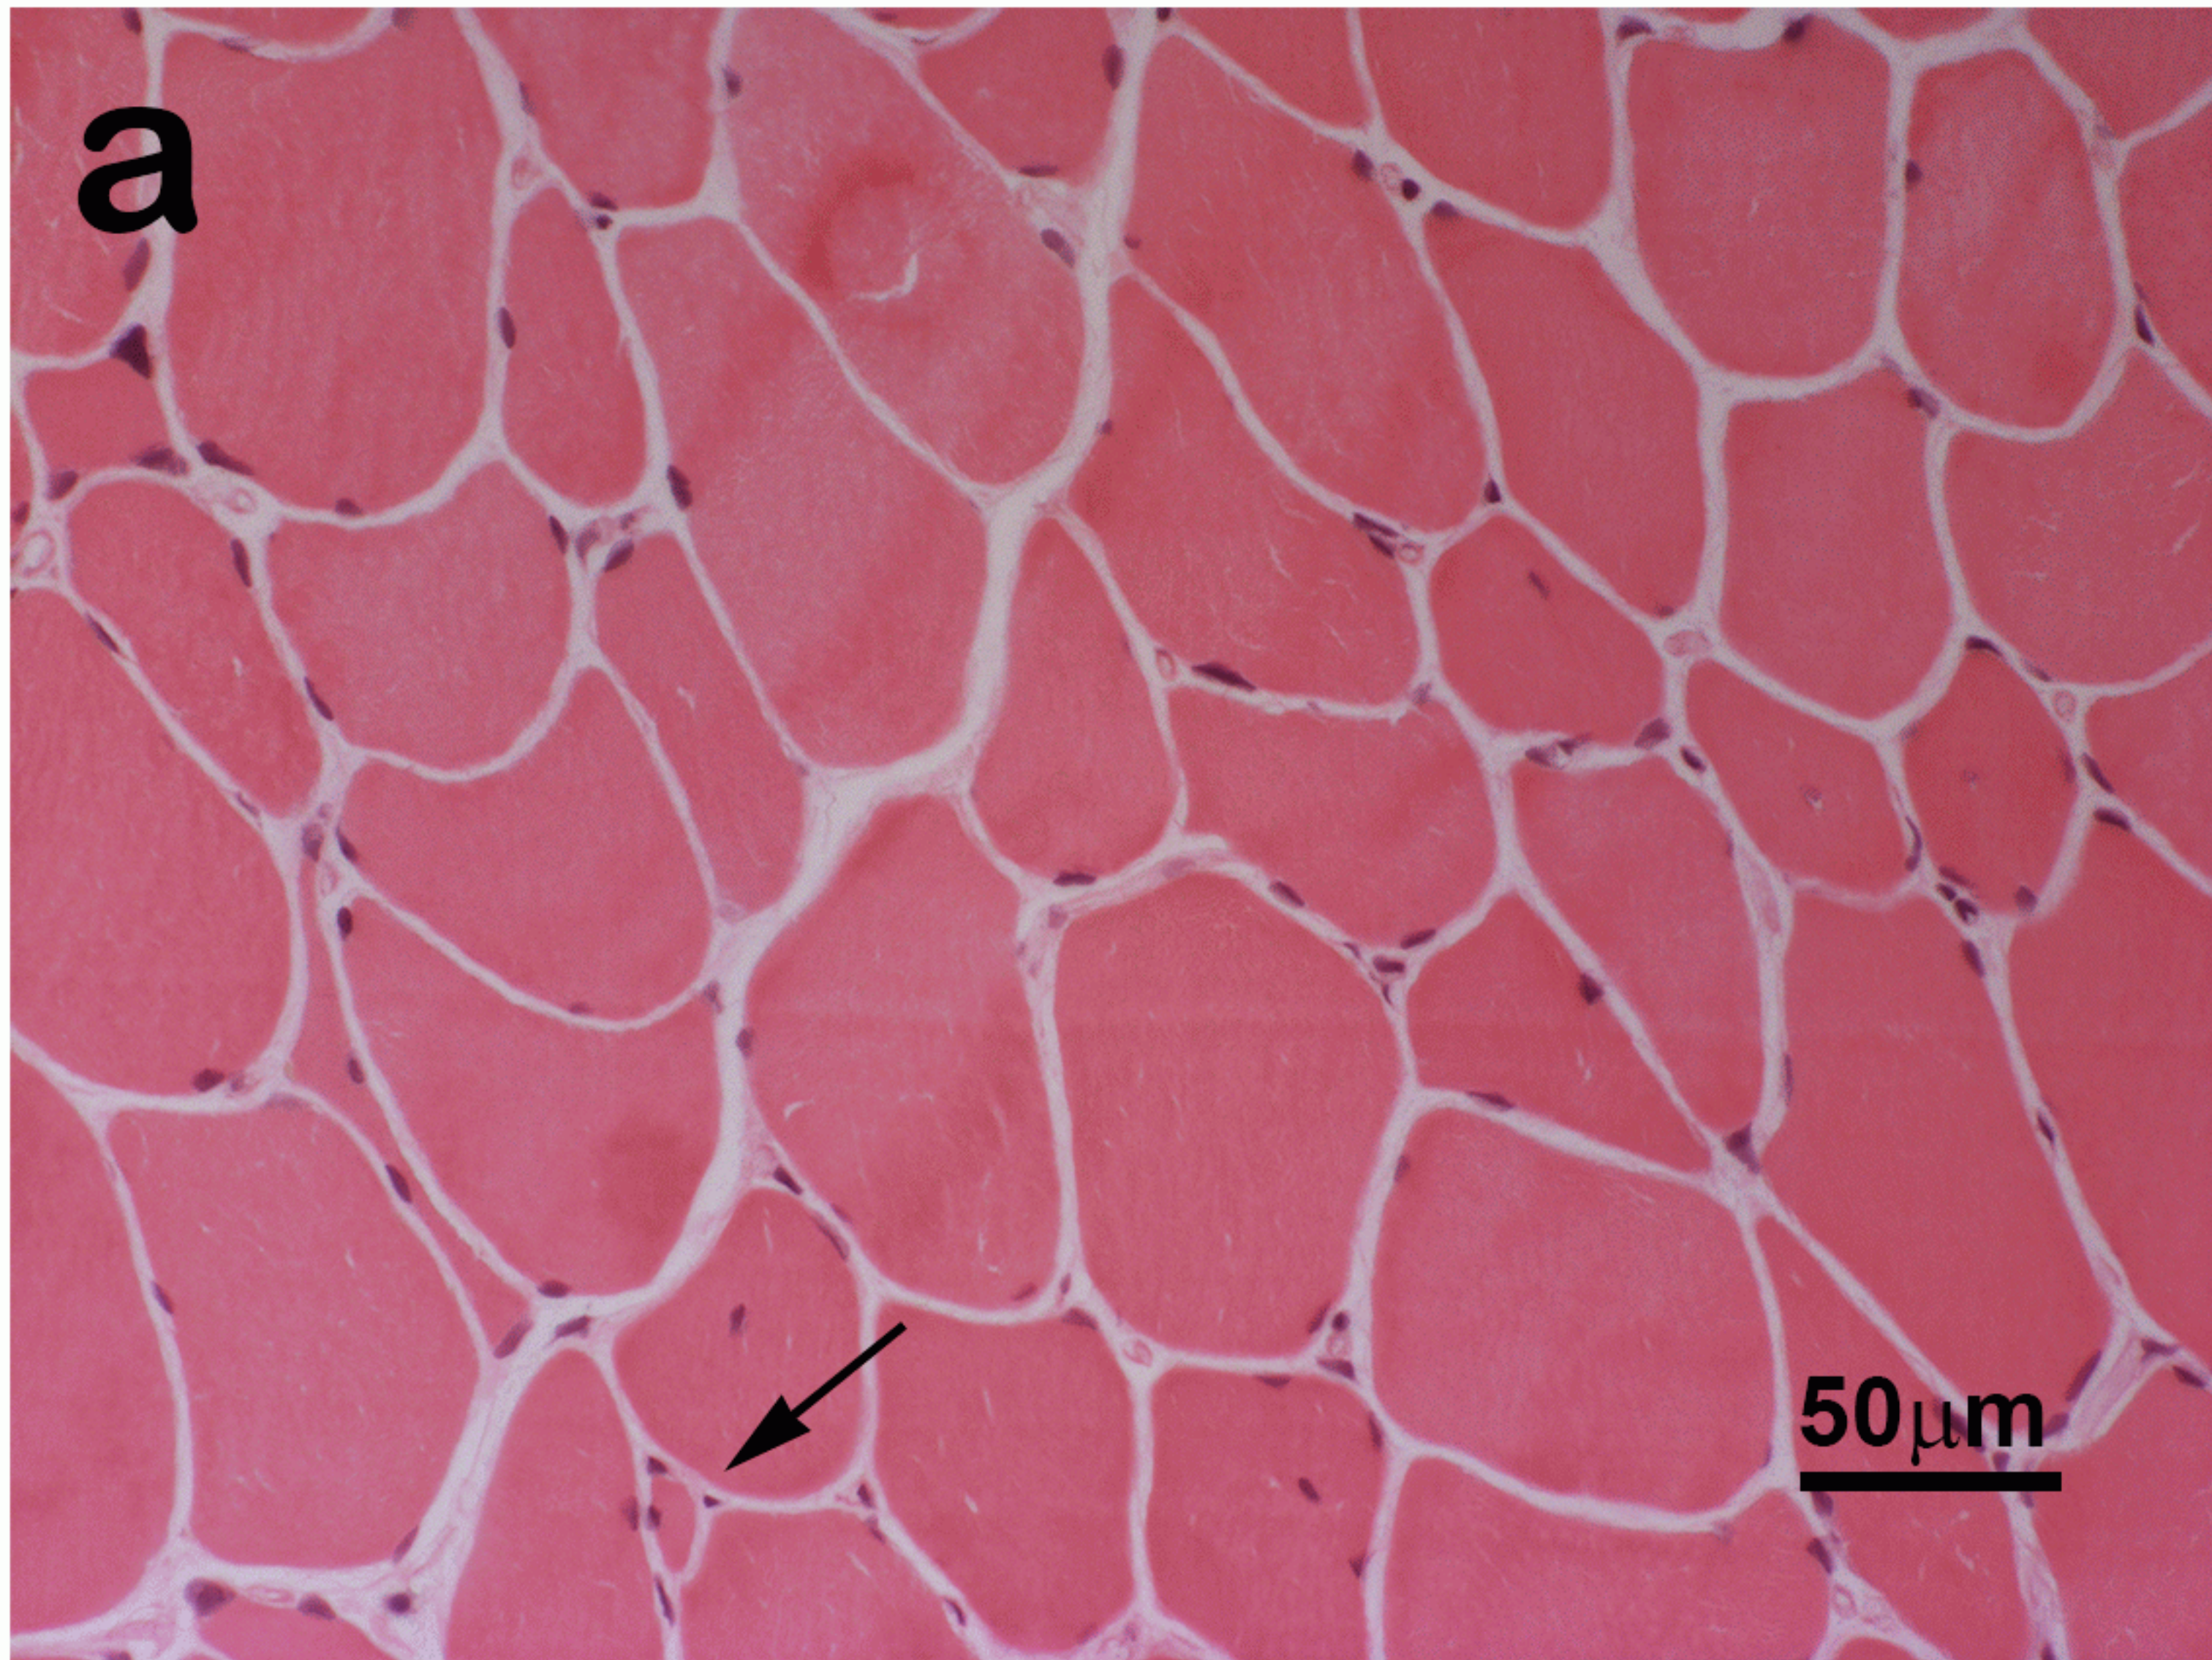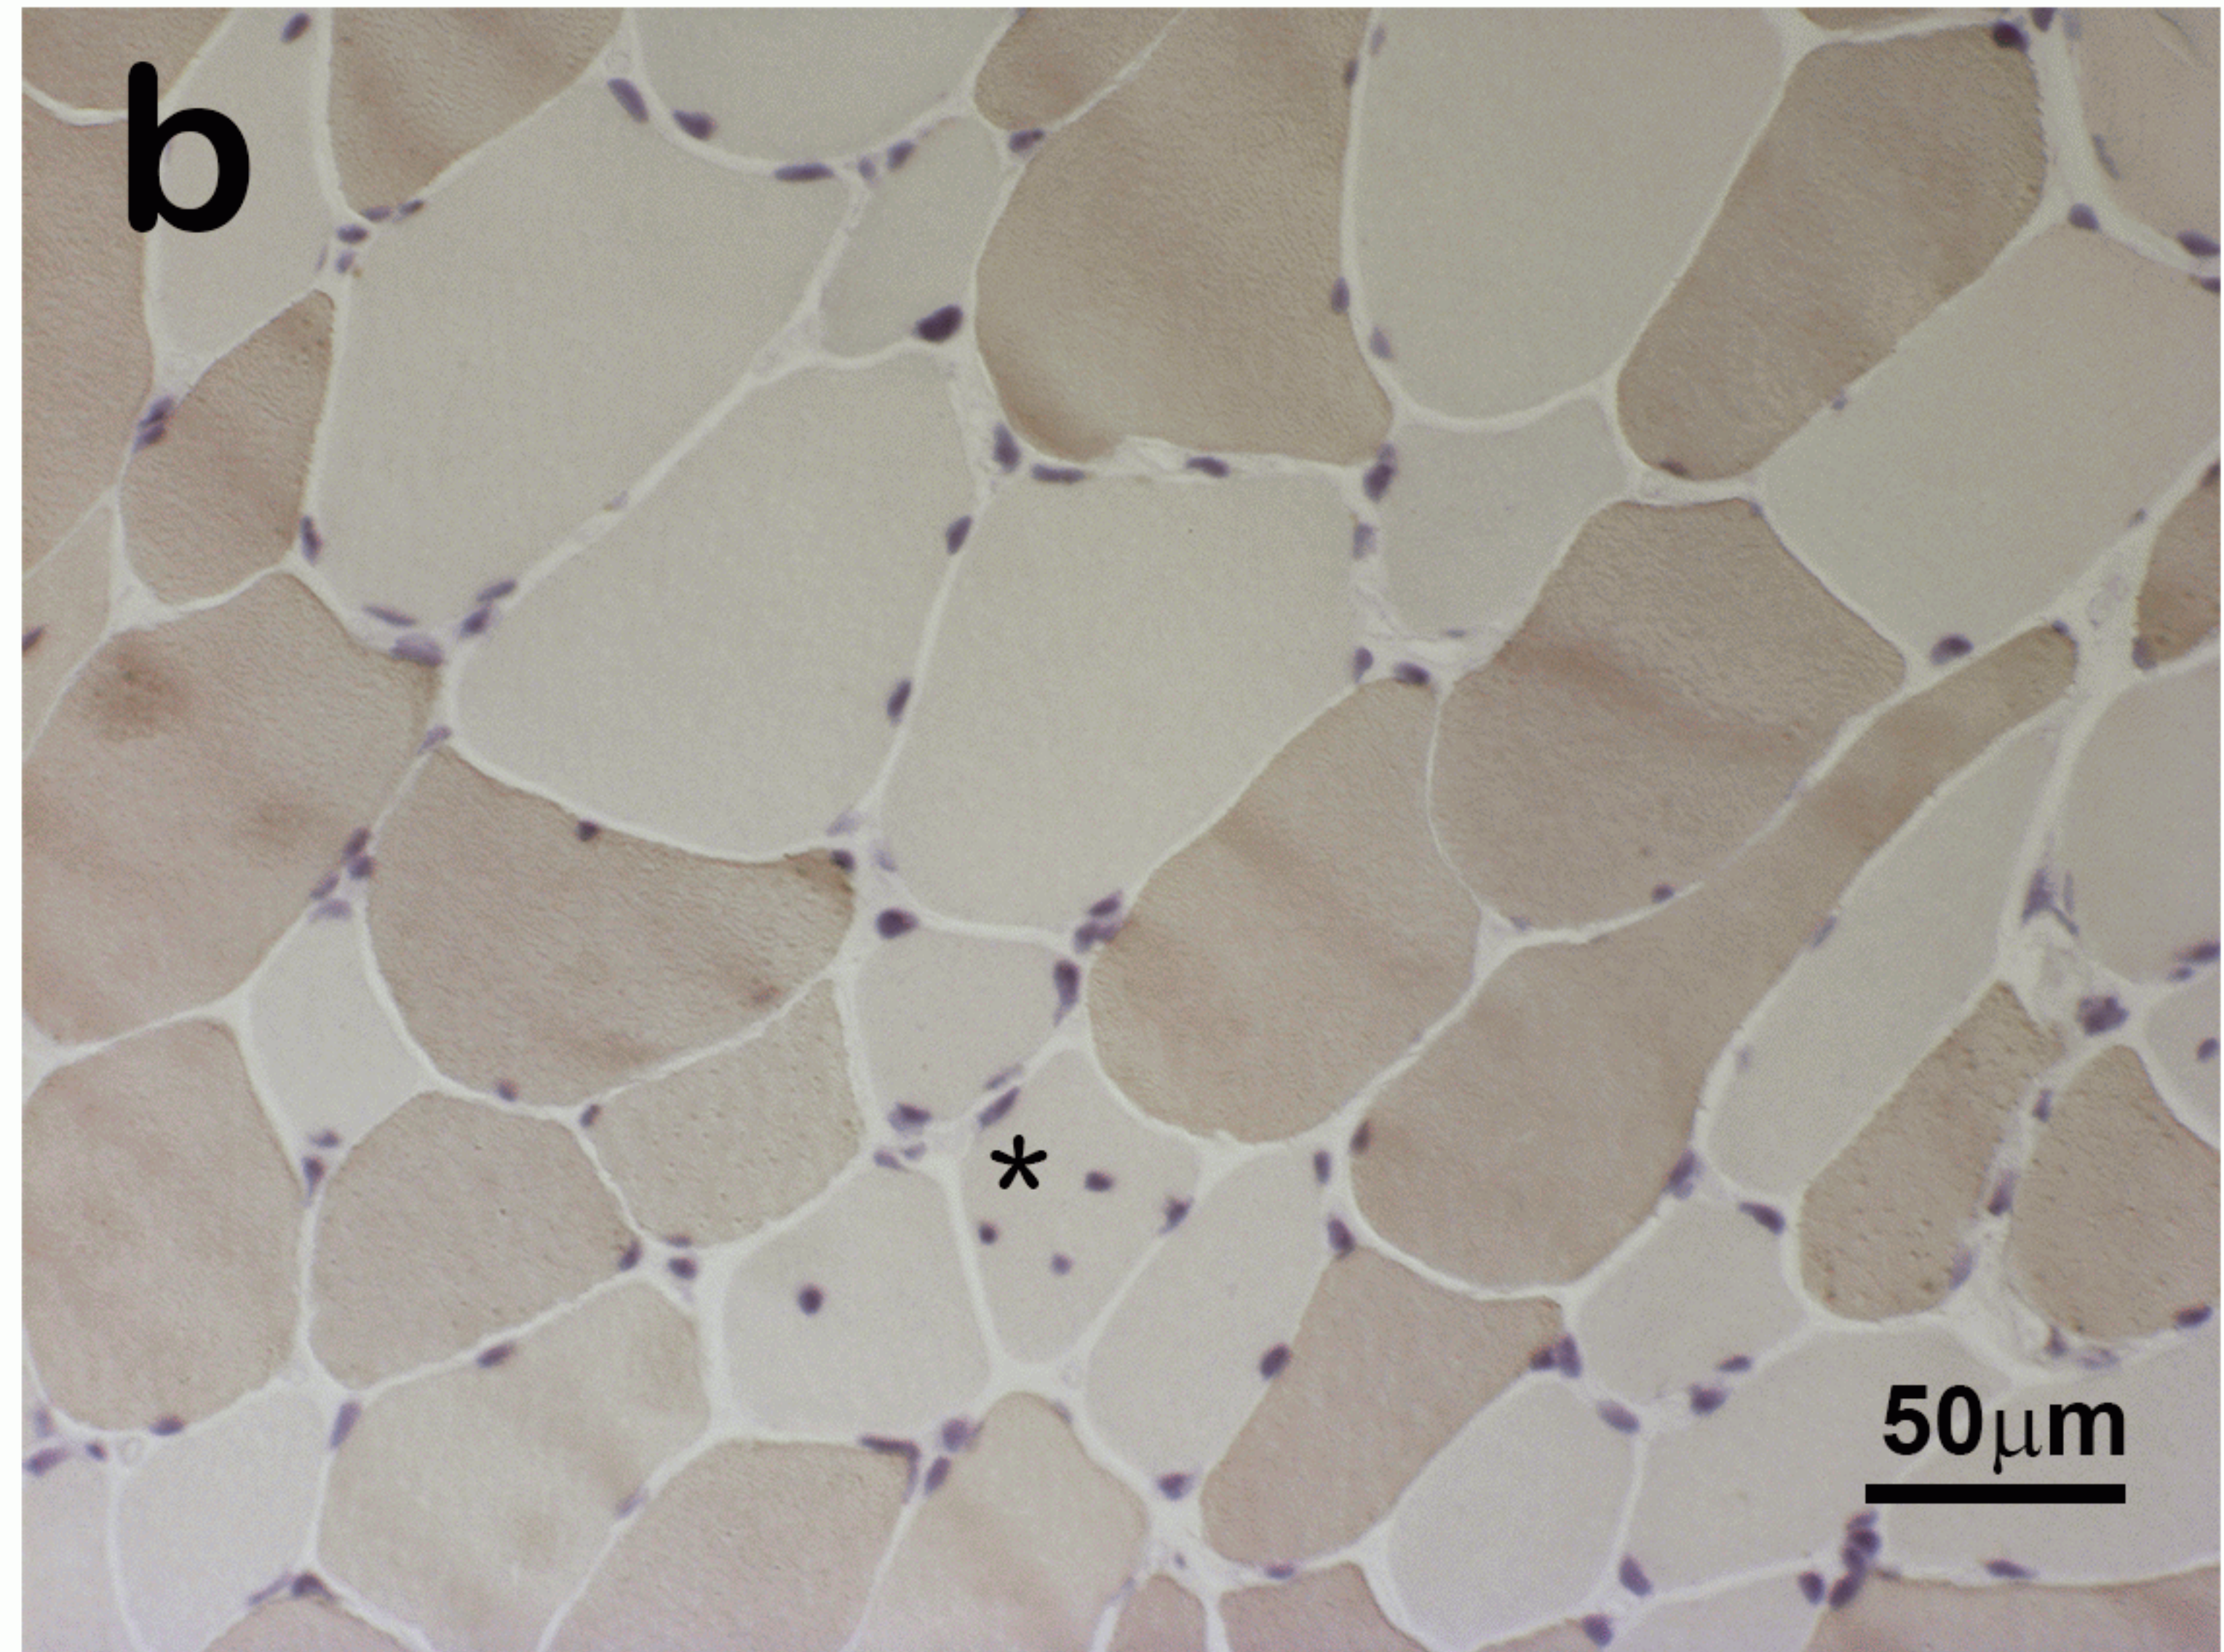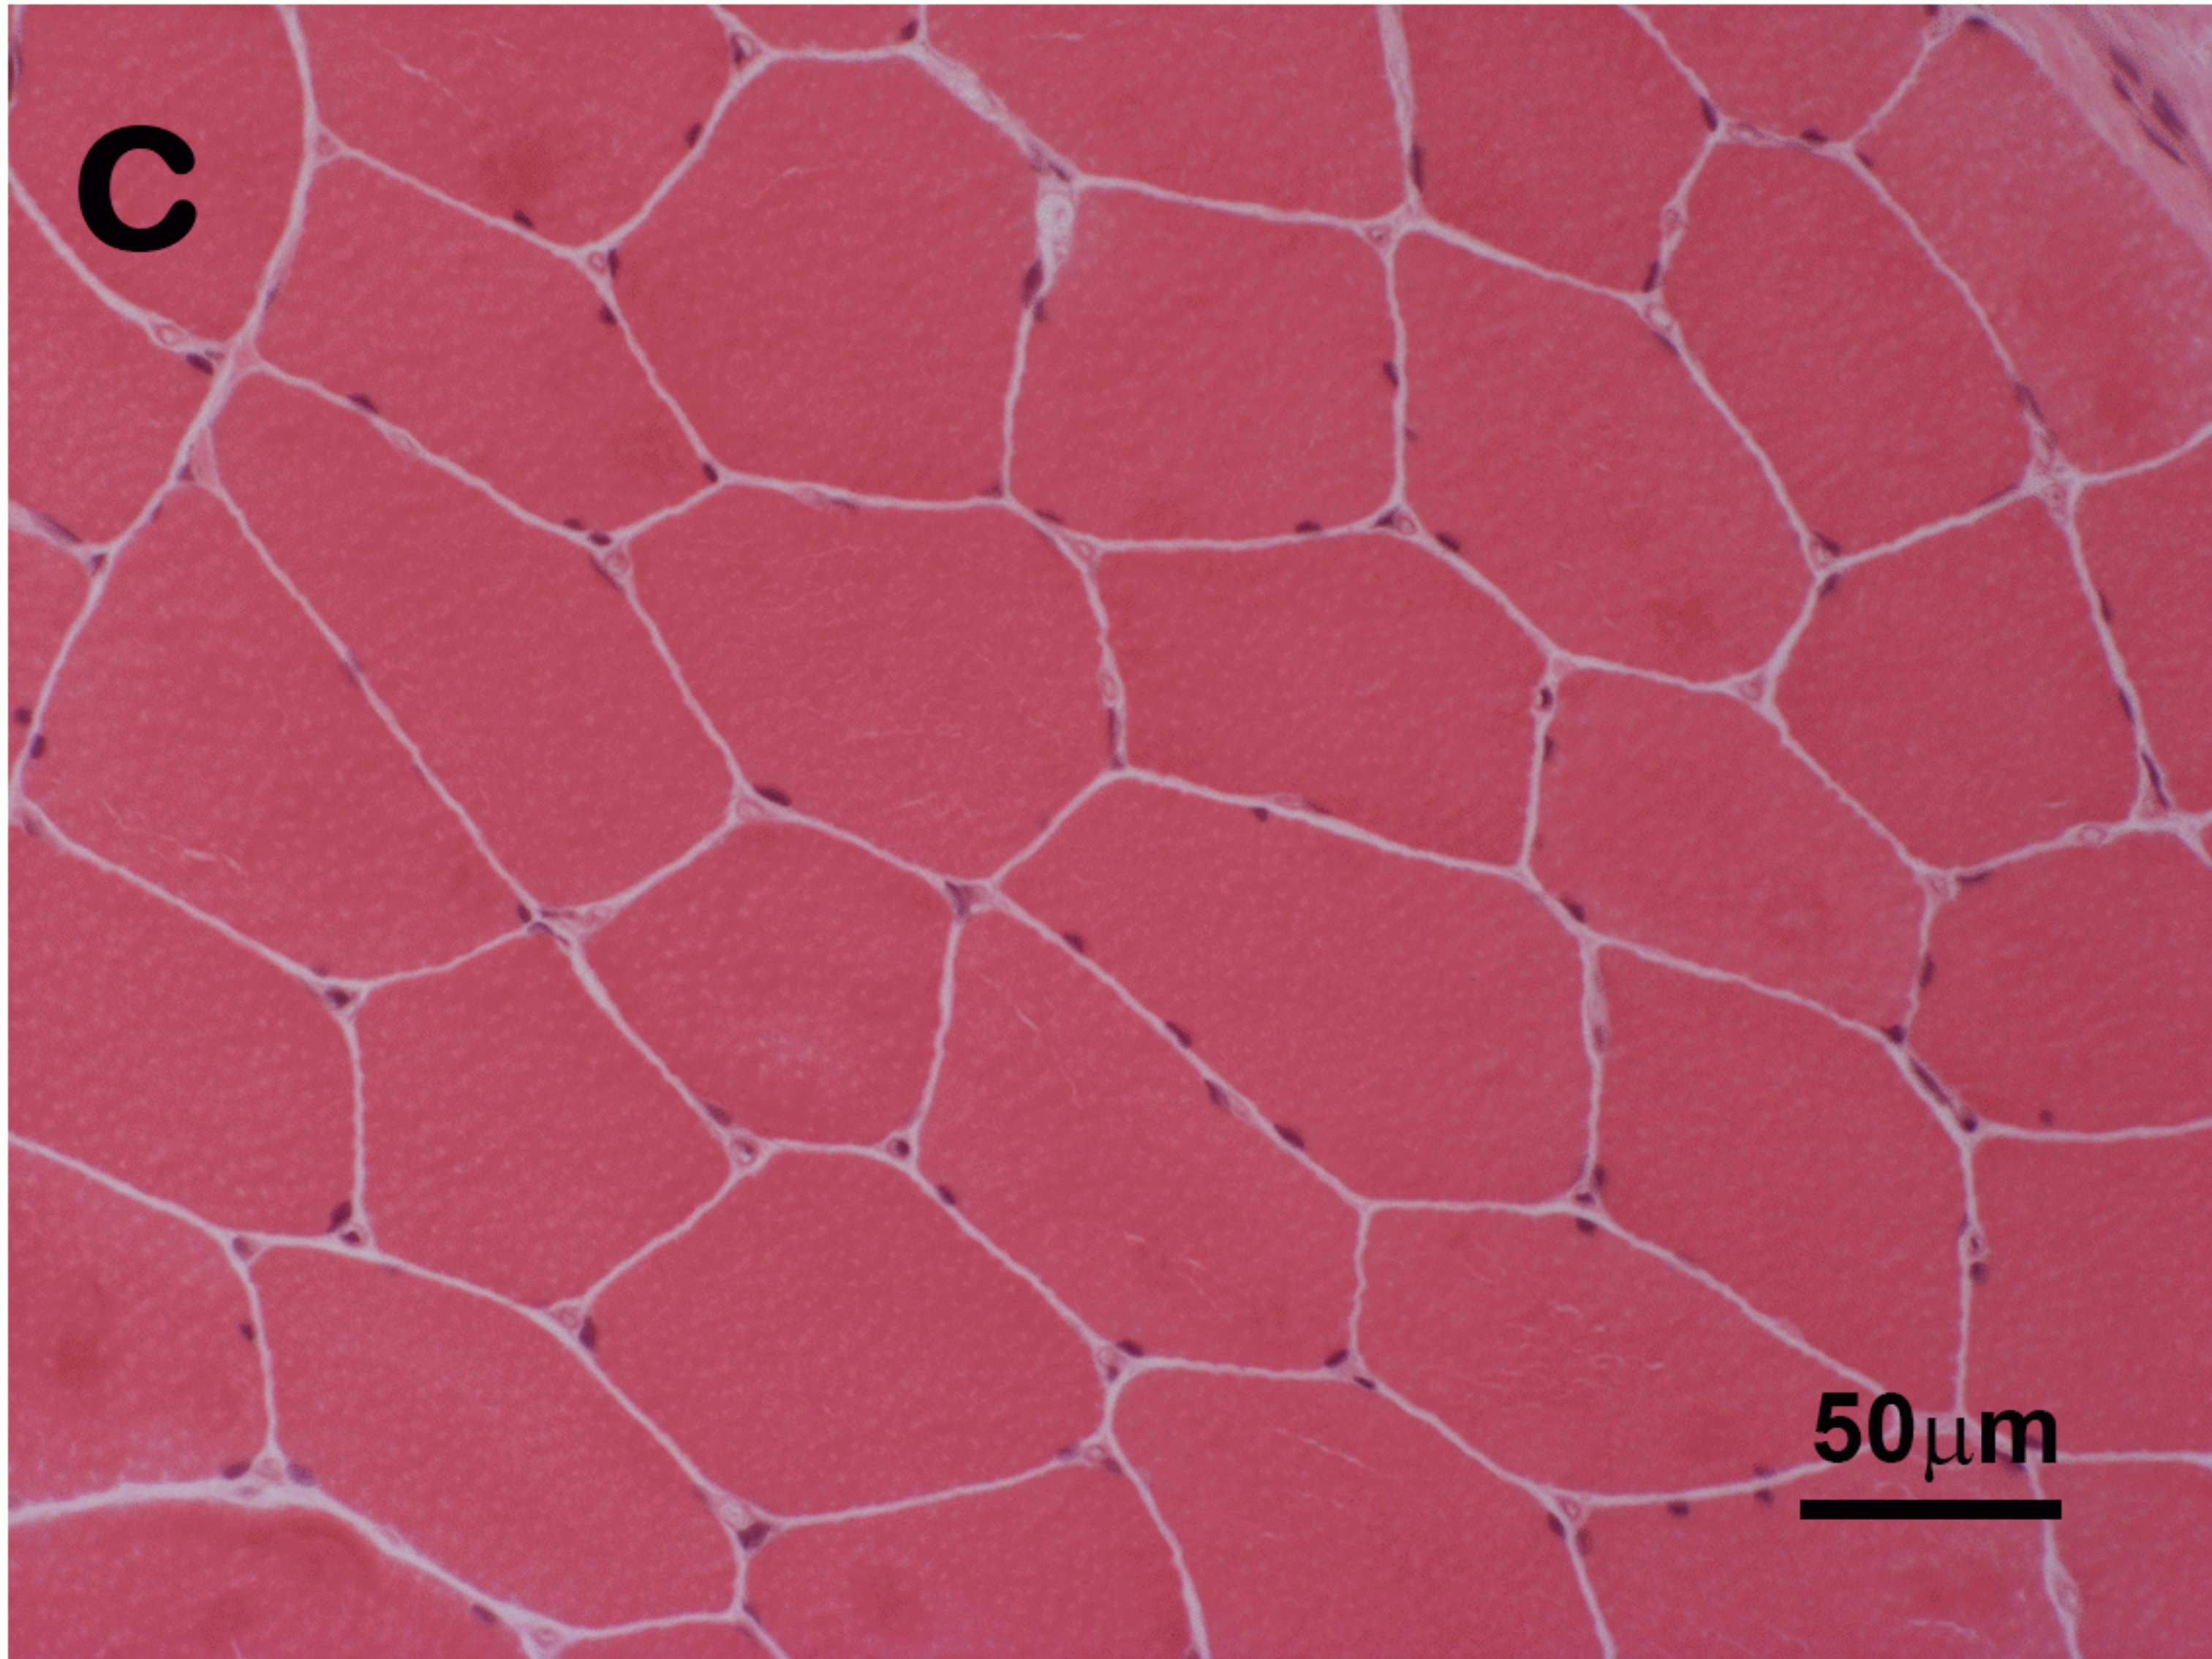

**Supplementary\_Figure S1**



## Supplementary Figure S2

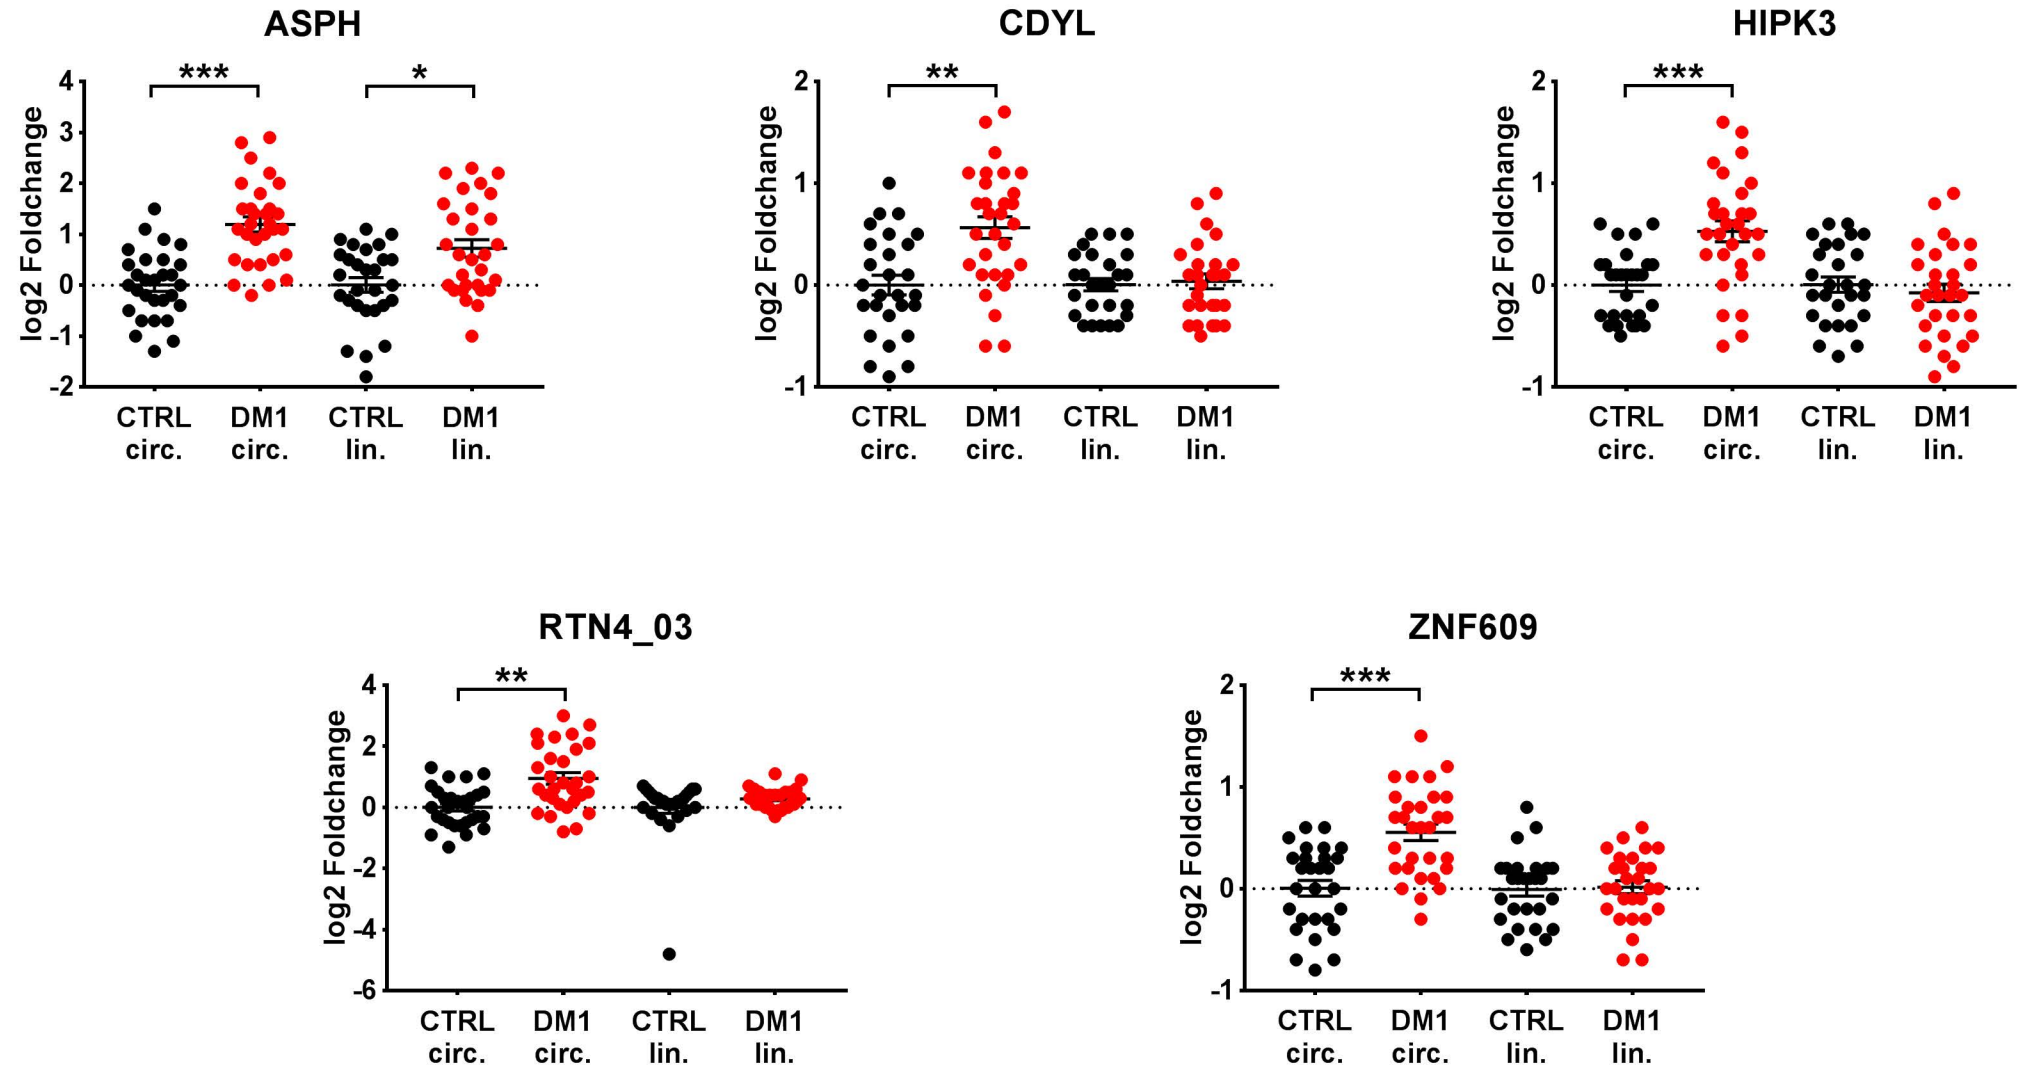

a

## CIRCULAR TRANSCRIPTS

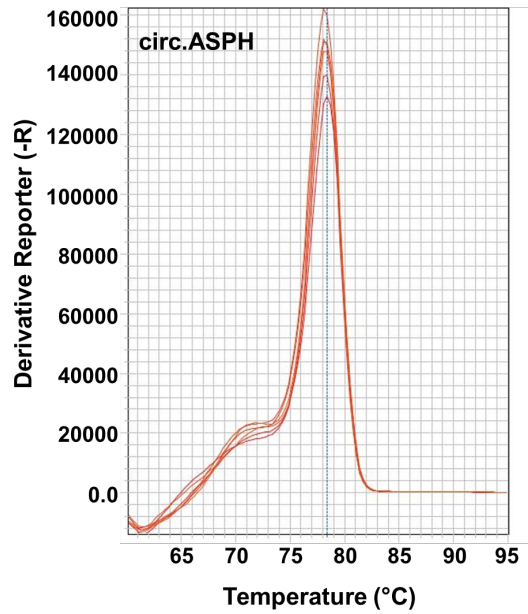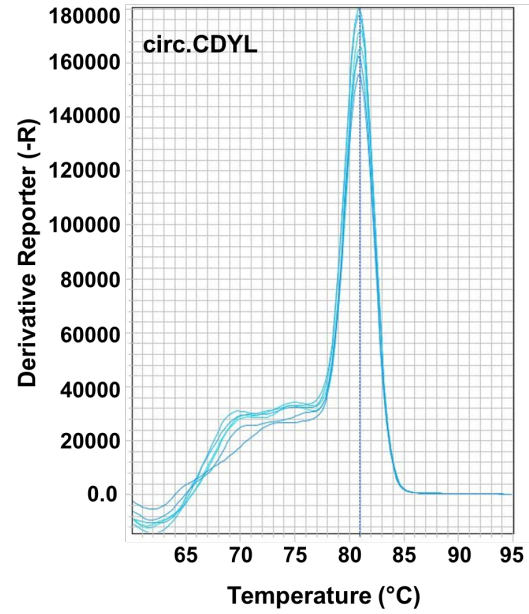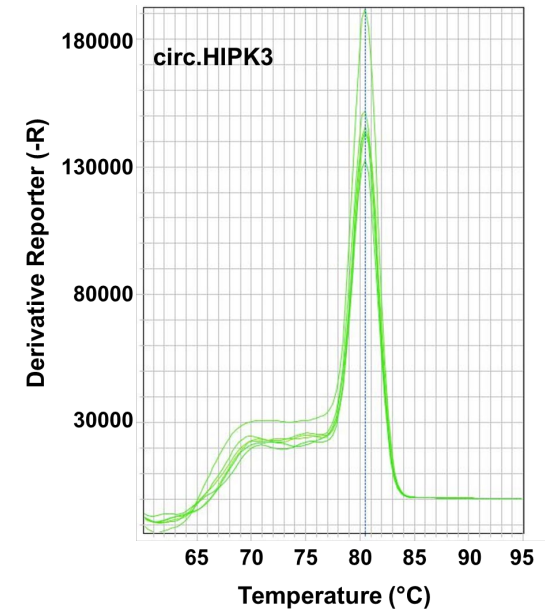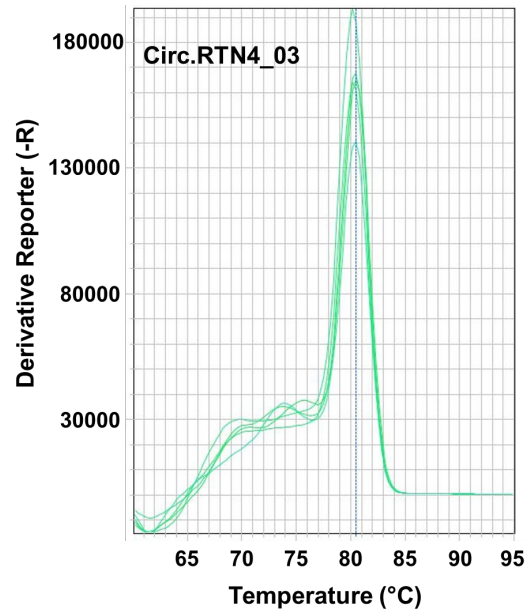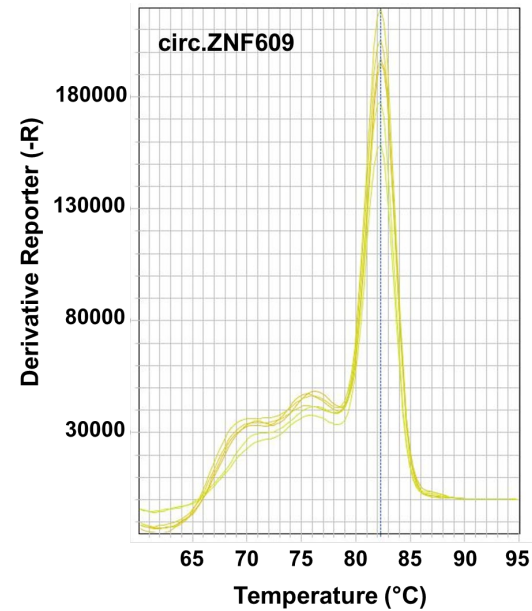

**b**

**LINEAR TRANSCRIPTS**

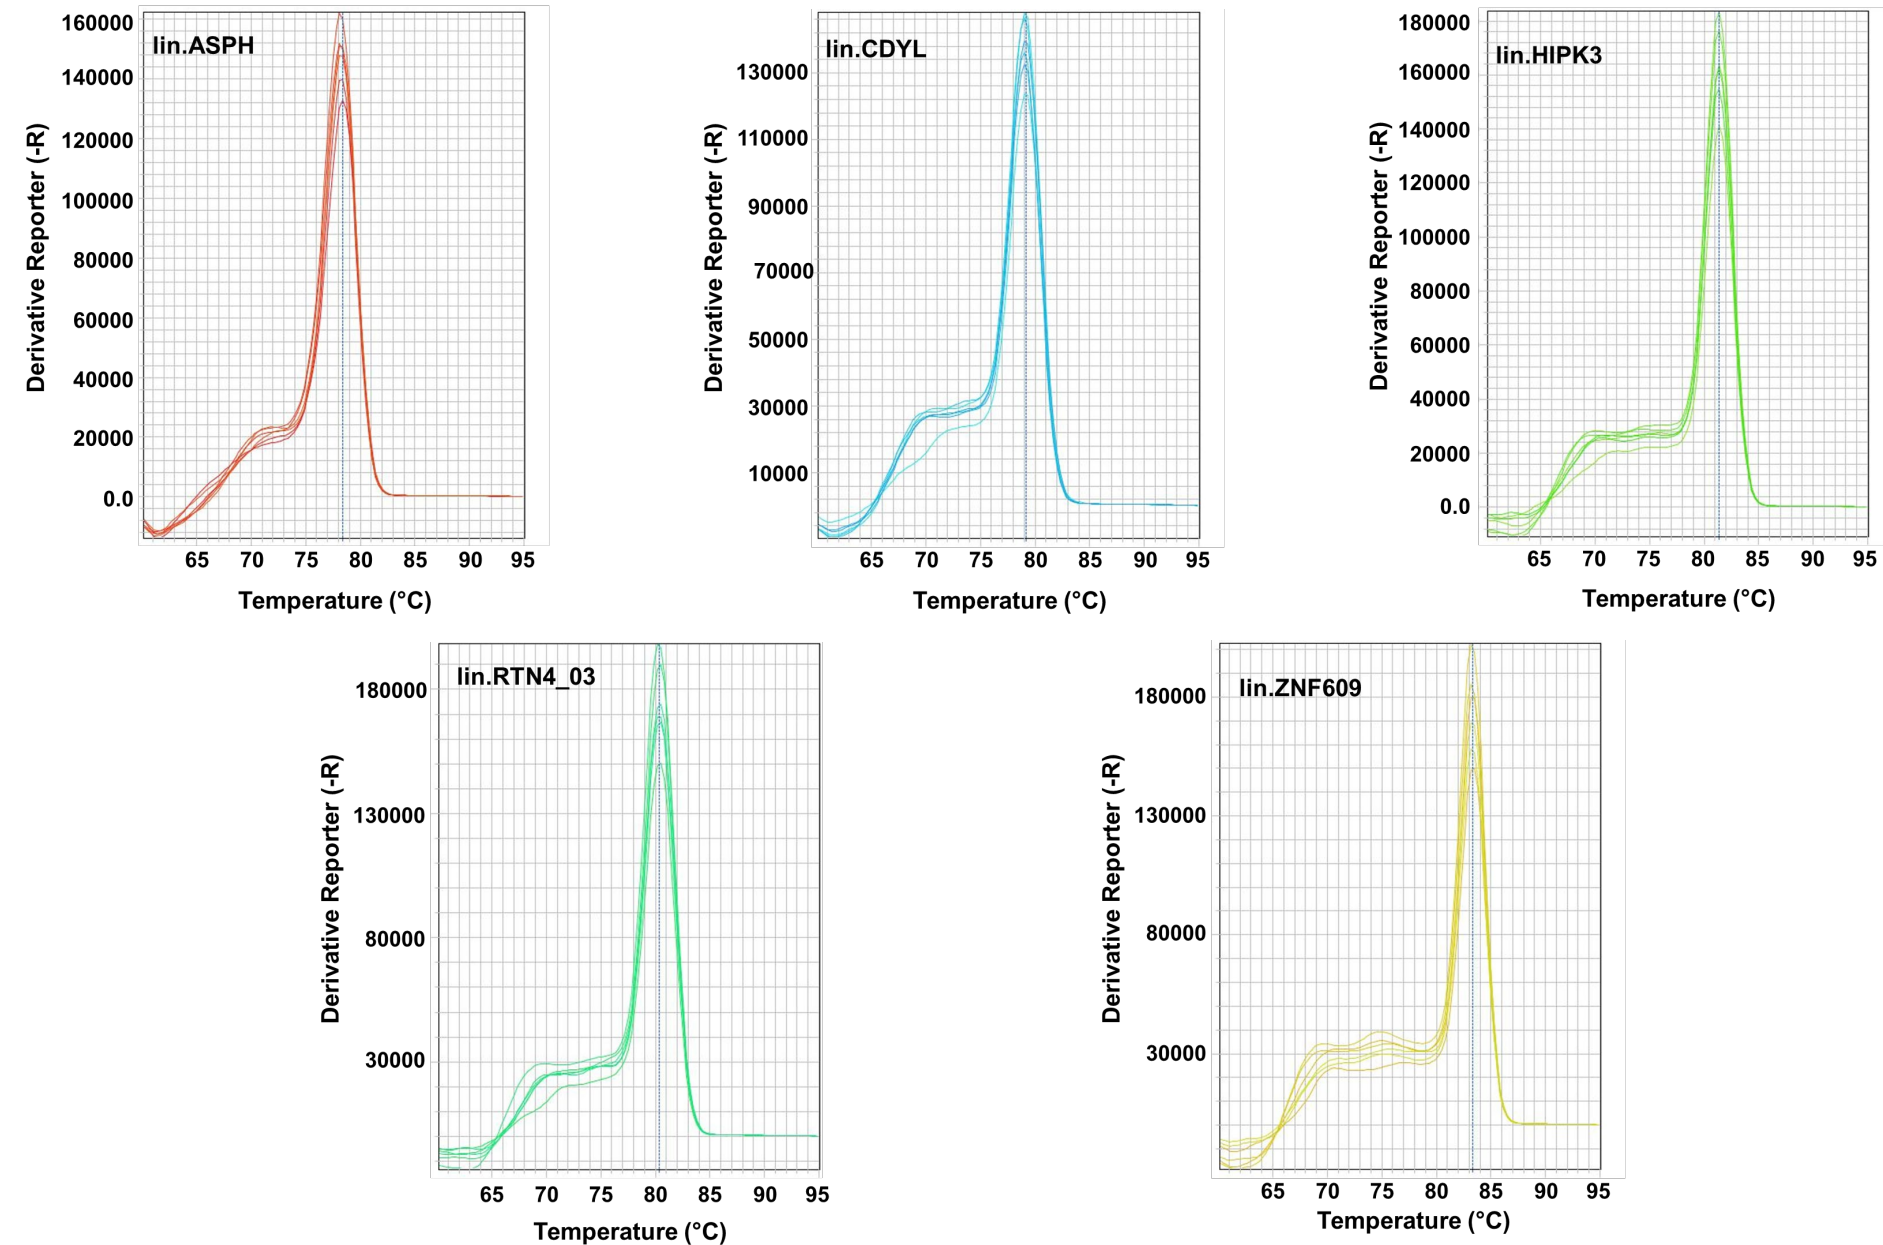

C

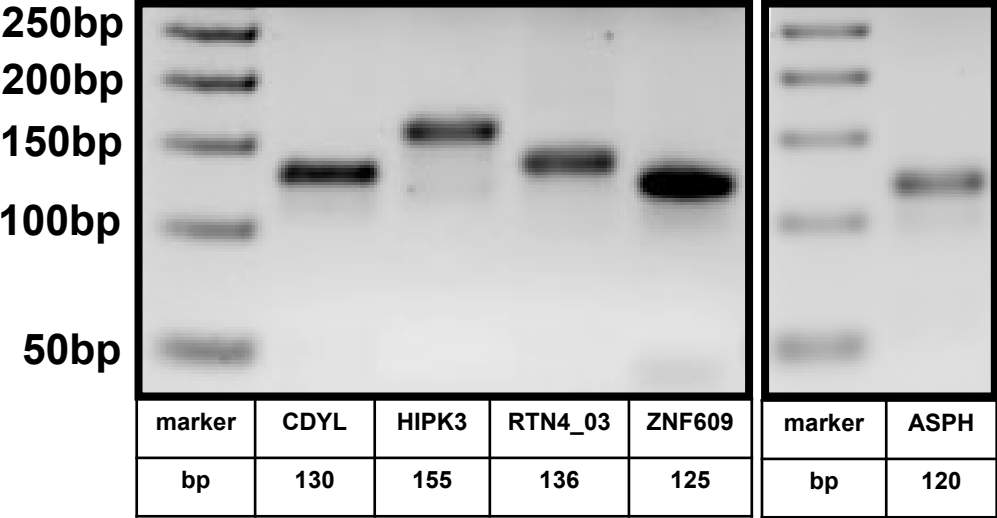

# Supplementary Figure S4

**circASPH**

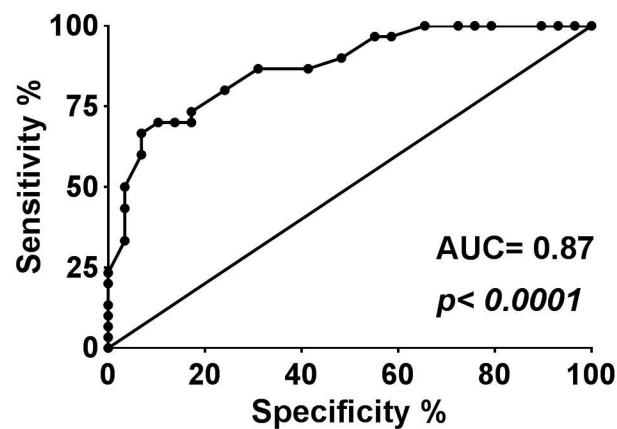

**circCDYL**

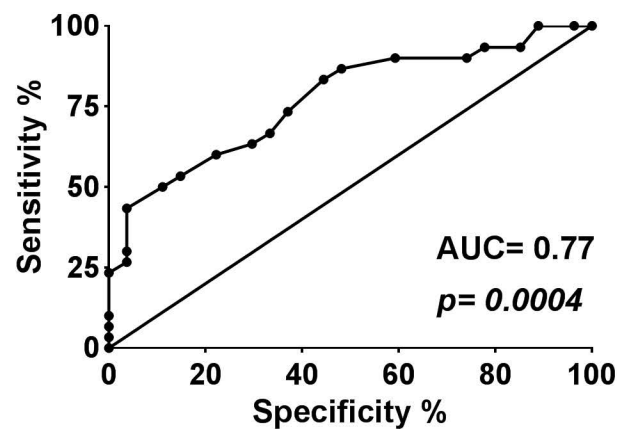

**circHIPK3**

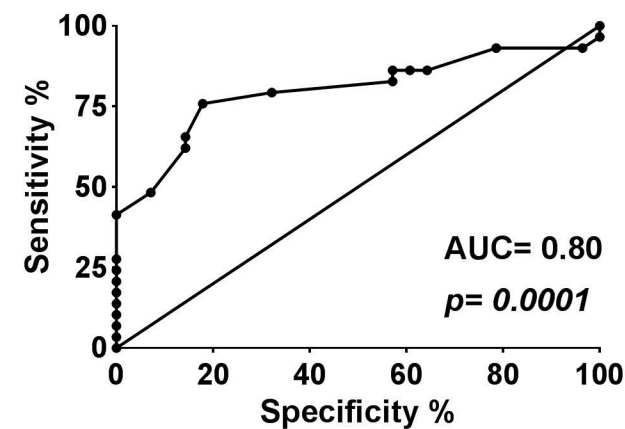

**circRTN4\_03**

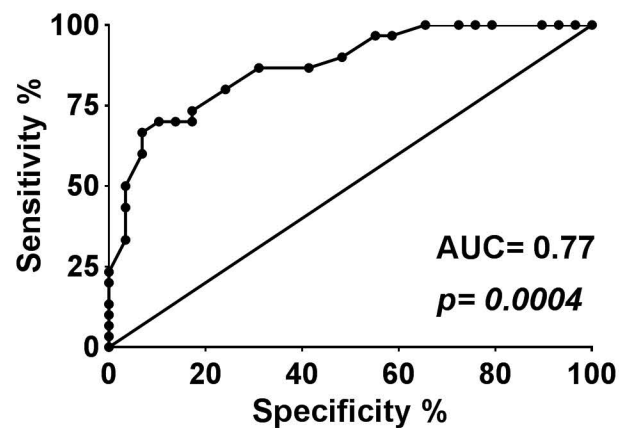

**circZNF609**

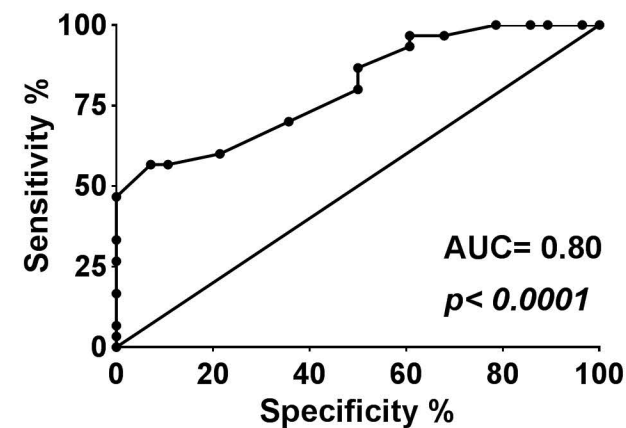

# Supplementary Figure S5

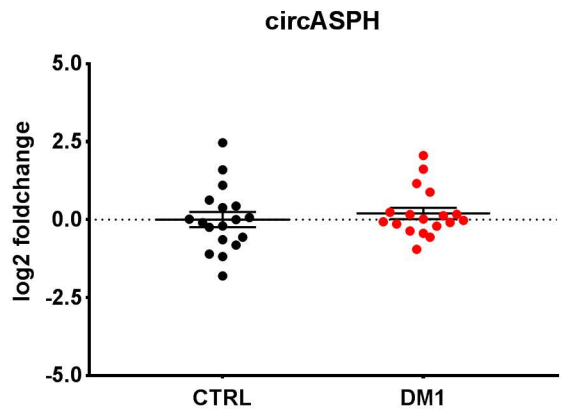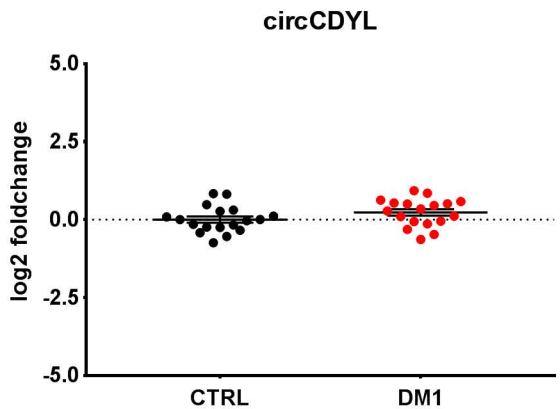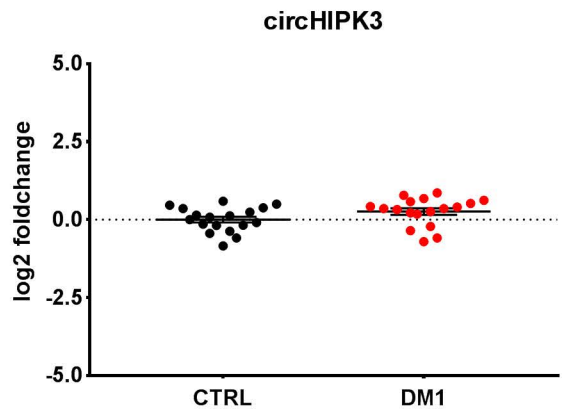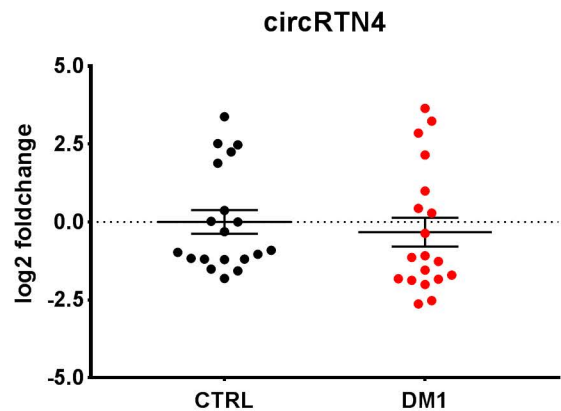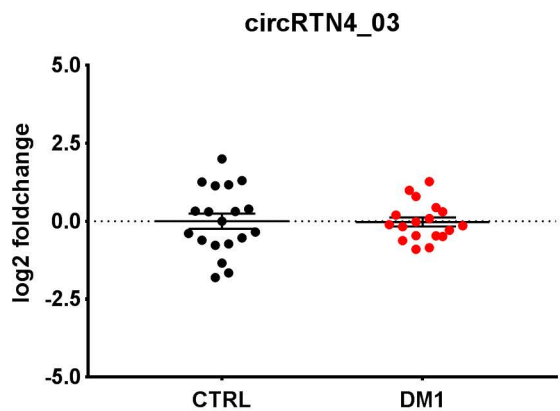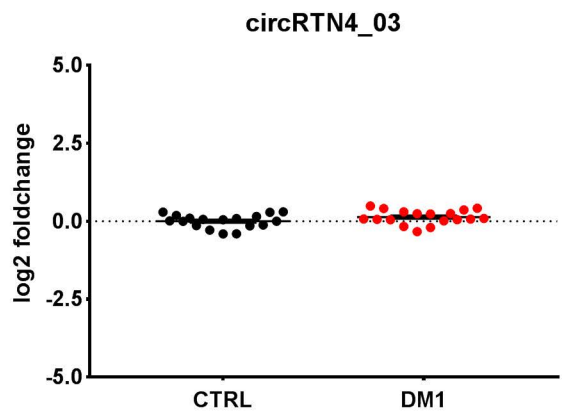

## Supplementary Figure S6

**circCDYL**

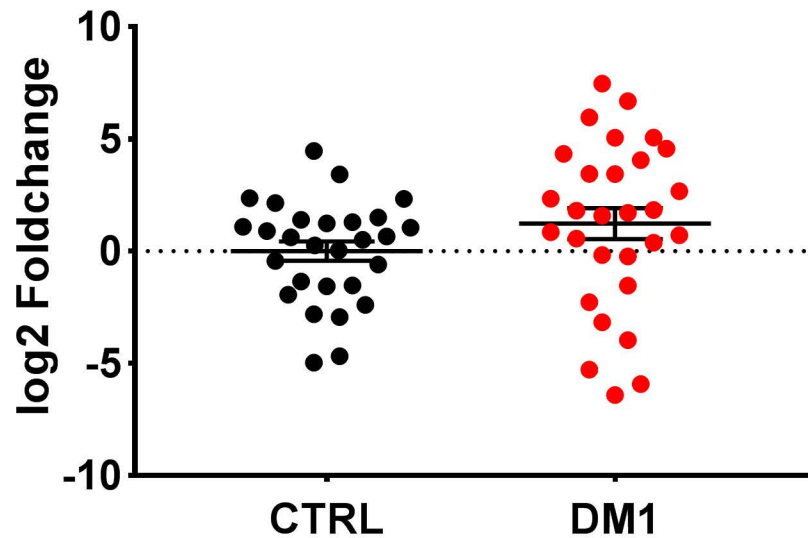

**circRTN4**

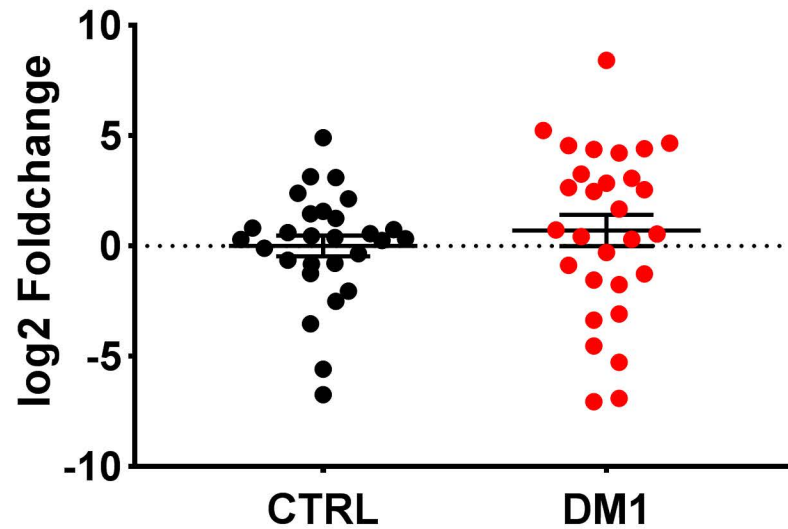



## Supplementary Figure S7

RTN4

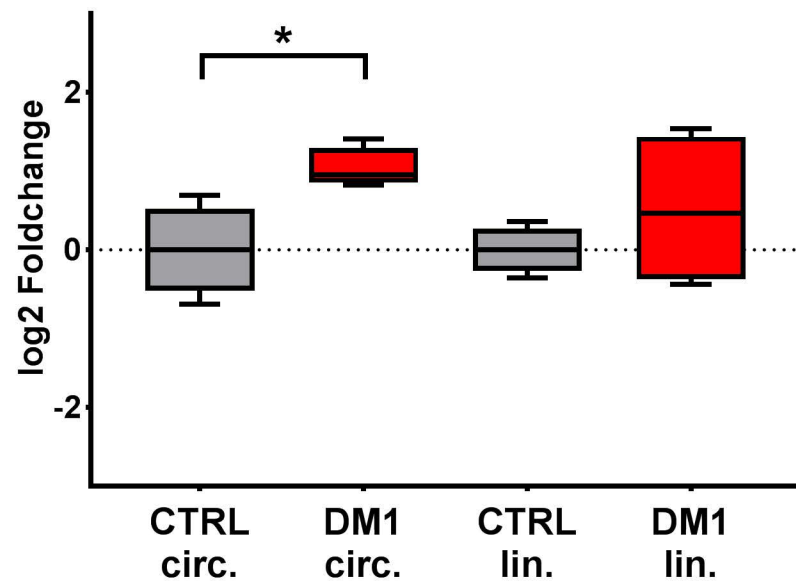

RTN4\_03

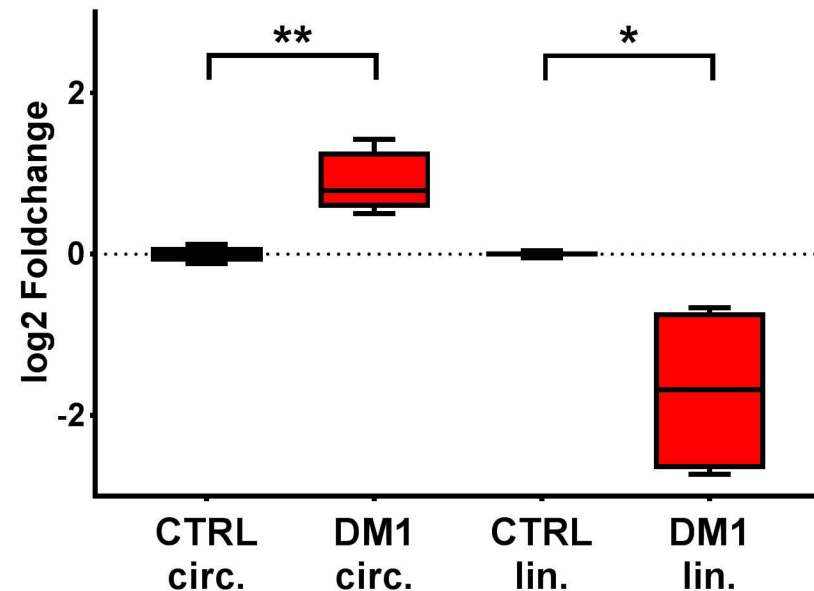



**a**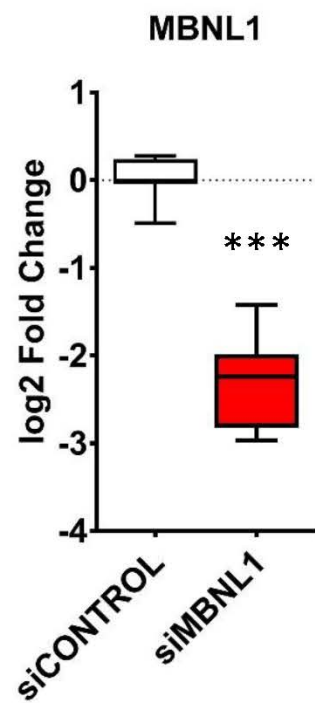**b**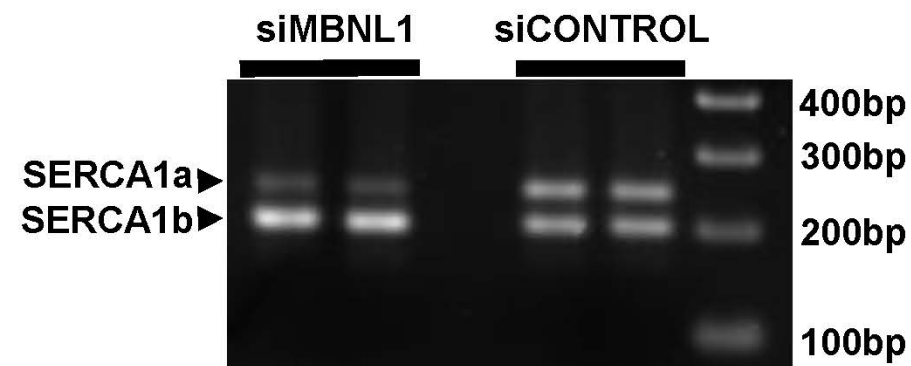**c**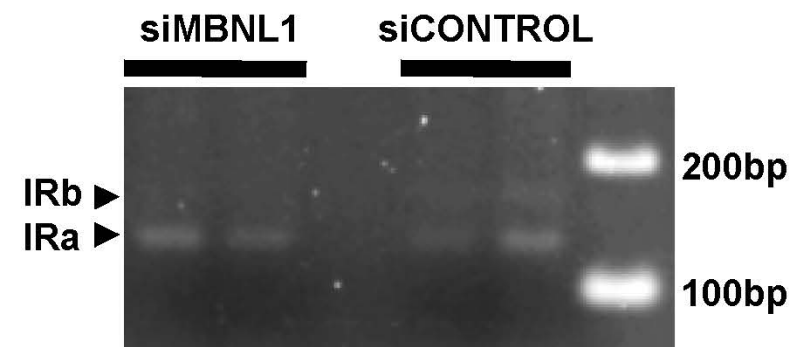**d**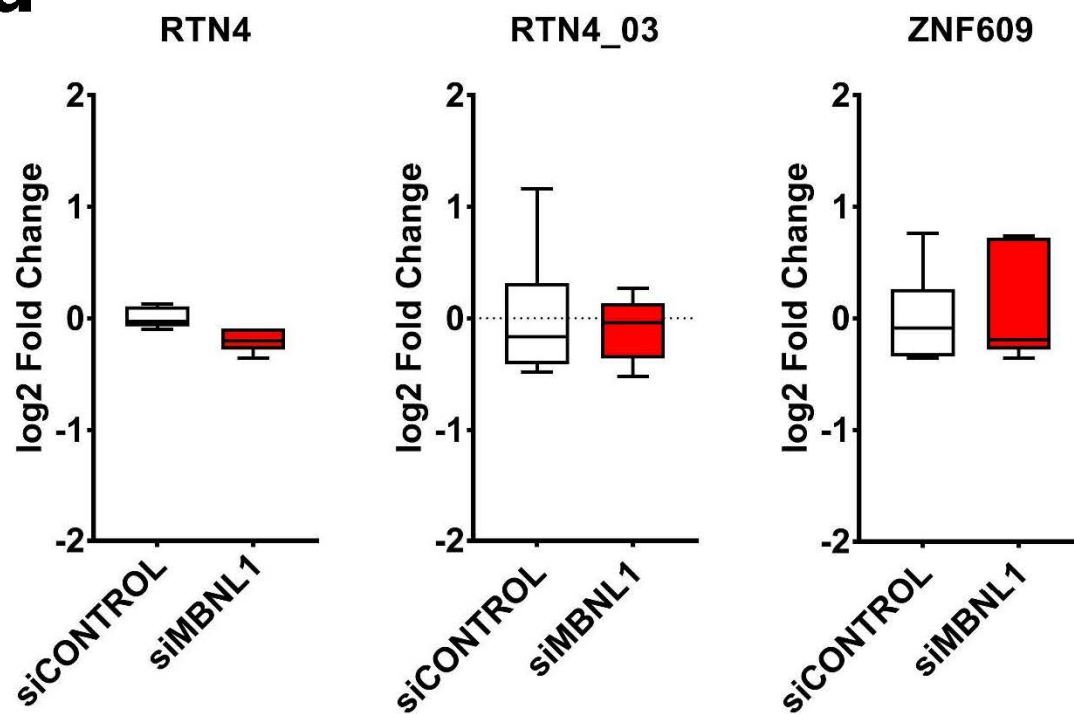



**a**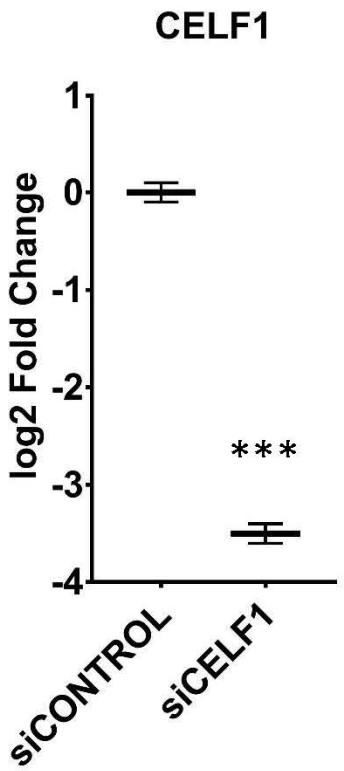**b**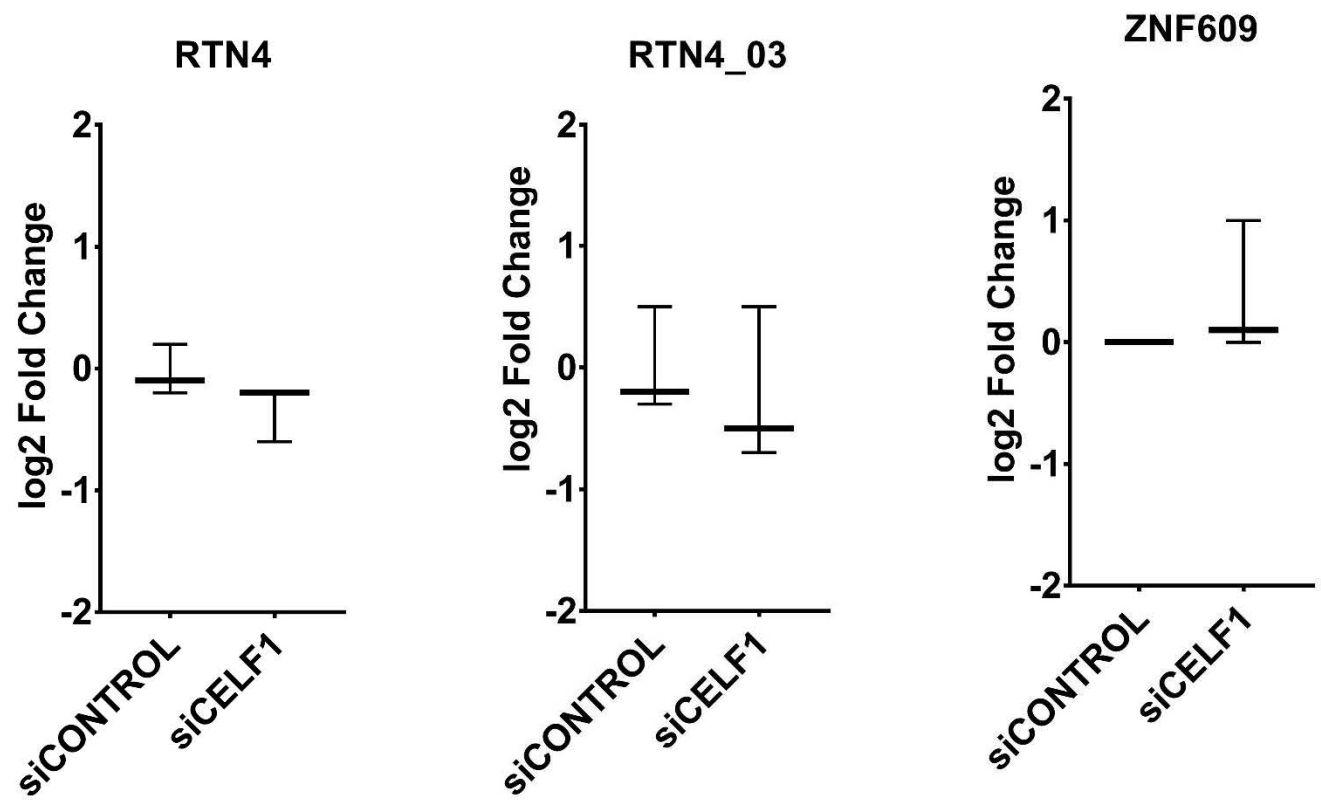

**Supplementary Figure S9**
